# Supplementary material for: Stillbirths: how should its rate be reported, its disability-adjusted-life-years (DALY), and stillbirths adjusted life expectancy
Source: Springer Nature journal article supplement (doi:10.1186/s12911-019-0850-8), 2019-07-16
Supplement: MOESM2 [file 16937744]

**Additional file 2: Still live-birth and total-birth rates, and SLBR:NMR ratio, 2000 and 2015, by country**

| Country name             | MDG region                      | Income group        | 2000  |       | 2015  |       | % Δ 2000-2015 |        |        |           | SLBR:NMR=SB:NM |       |       |
|--------------------------|---------------------------------|---------------------|-------|-------|-------|-------|---------------|--------|--------|-----------|----------------|-------|-------|
|                          |                                 |                     | SLBR  | STBR  | SLBR  | STBR  | SLBR-STBR     | SLBR   | STBR   | SLBR-STBR | NMR            | 2000  | 2015  |
| Afghanistan              | Southern Asia                   | Low income          | 37.01 | 35.69 | 27.48 | 26.75 | 0.73          | -25.75 | -25.05 | 0.70      | -21.37         | 81.6  | 77.1  |
| Albania                  | Developed region                | Upper middle income | 5.79  | 5.76  | 4.00  | 3.98  | 0.02          | -30.92 | -30.90 | 0.02      | -45.12         | 51.4  | 64.7  |
| Algeria                  | North Africa and Middle East    | Upper middle income | 26.70 | 26.01 | 19.70 | 19.32 | 0.38          | -26.22 | -25.72 | 0.50      | -26.04         | 127.6 | 127.3 |
| Andorra                  | Developed region                | High income:        | 1.10  | 1.10  | 1.40  | 1.40  | 0.00          | 27.27  | 27.27  | 0.00      | -59.62         | 42.3  | 133.3 |
| Angola                   | Sub-Saharan Africa              | Upper middle income | 35.49 | 34.27 | 28.08 | 27.31 | 0.77          | -20.88 | -20.31 | 0.57      | -16.46         | 60.6  | 57.4  |
| Antigua and Barbuda      | Latin America and the Caribbean | High income:        | 8.77  | 8.70  | 7.00  | 6.95  | 0.05          | -20.18 | -20.11 | 0.07      | -52.07         | 93.2  | 155.2 |
| Argentina                | Latin America and the Caribbean | High income:        | 7.37  | 7.32  | 4.60  | 4.57  | 0.03          | -37.58 | -37.57 | 0.01      | -44.24         | 65.3  | 73.1  |
| Armenia                  | Caucasus and Central Asia       | Lower middle income | 21.48 | 21.03 | 13.96 | 13.77 | 0.19          | -35.01 | -34.52 | 0.49      | -53.40         | 135.4 | 188.9 |
| Australia                | Developed region                | High income: OECD   | 3.37  | 3.36  | 2.72  | 2.71  | 0.01          | -19.29 | -19.35 | -0.06     | -37.14         | 96.3  | 123.6 |
| Austria                  | Developed region                | High income: OECD   | 4.67  | 4.65  | 3.64  | 3.63  | 0.01          | -22.06 | -21.94 | 0.12      | -32.26         | 150.6 | 173.3 |
| Azerbaijan               | Caucasus and Central Asia       | Upper middle income | 25.85 | 25.20 | 16.74 | 16.47 | 0.27          | -35.24 | -34.64 | 0.60      | -45.56         | 77.1  | 91.7  |
| Bahamas, The             | Latin America and the Caribbean | High income:        | 11.27 | 11.15 | 10.35 | 10.24 | 0.11          | -8.16  | -8.16  | 0.00      | -19.84         | 130   | 148.9 |
| Bahrain                  | North Africa and Middle East    | High income:        | 9.48  | 9.39  | 5.55  | 5.52  | 0.03          | -41.46 | -41.21 | 0.25      | -76.43         | 201.3 | 500.0 |
| Bangladesh               | Southern Asia                   | Lower middle income | 44.22 | 42.35 | 26.02 | 25.36 | 0.66          | -41.16 | -40.12 | 1.04      | -45.47         | 103   | 111.1 |
| Barbados                 | Latin America and the Caribbean | High income:        | 9.28  | 9.20  | 8.59  | 8.52  | 0.07          | -7.44  | -7.39  | 0.05      | -7.49          | 108.7 | 108.7 |
| Belarus                  | Developed region                | Upper middle income | 5.66  | 5.63  | 2.97  | 2.96  | 0.01          | -47.53 | -47.42 | 0.11      | -74.29         | 76.6  | 156.3 |
| Belgium                  | Developed region                | High income: OECD   | 3.55  | 3.54  | 3.02  | 3.01  | 0.01          | -14.93 | -14.97 | -0.04     | -26.67         | 118.3 | 137.3 |
| Belize                   | Latin America and the Caribbean | Upper middle income | 11.29 | 11.16 | 9.84  | 9.75  | 0.09          | -12.84 | -12.63 | 0.21      | -33.76         | 90.3  | 118.8 |
| Benin                    | Sub-Saharan Africa              | Low income          | 37.46 | 36.11 | 31.24 | 30.30 | 0.94          | -16.6  | -16.09 | 0.51      | -19.59         | 94.5  | 98.0  |
| Bhutan                   | Southern Asia                   | Lower middle income | 27.59 | 26.85 | 16.19 | 15.94 | 0.25          | -41.32 | -40.63 | 0.69      | -44.16         | 84    | 88.2  |
| Bolivia                  | Latin America and the Caribbean | Lower middle income | 18.06 | 17.74 | 13.04 | 12.87 | 0.17          | -27.8  | -27.45 | 0.35      | -34.41         | 60.2  | 66.3  |
| Bosnia and Herzegovina   | Developed region                | Upper middle income | 6.74  | 6.70  | 5.48  | 5.45  | 0.03          | -18.69 | -18.66 | 0.03      | -39.70         | 102.1 | 137.7 |
| Botswana                 | Sub-Saharan Africa              | Upper middle income | 17.84 | 17.53 | 15.46 | 15.22 | 0.24          | -13.34 | -13.18 | 0.16      | -8.49          | 74.2  | 70.3  |
| Brazil                   | Latin America and the Caribbean | Upper middle income | 12.24 | 12.09 | 8.65  | 8.58  | 0.07          | -29.33 | -29.03 | 0.30      | -44.23         | 76.8  | 97.3  |
| Brunei Darussalam        | Southeastern Asia and Oceania   | High income:        | 6.98  | 6.93  | 6.52  | 6.47  | 0.05          | -6.59  | -6.64  | -0.05     | -12.60         | 141.9 | 151.6 |
| Bulgaria                 | Developed region                | Upper middle income | 8.54  | 8.46  | 5.77  | 5.73  | 0.04          | -32.44 | -32.27 | 0.17      | -50.44         | 75.7  | 103.2 |
| Burkina Faso             | Sub-Saharan Africa              | Low income          | 30.25 | 29.36 | 21.70 | 21.24 | 0.46          | -28.26 | -27.66 | 0.60      | -37.07         | 71.2  | 81.2  |
| Burundi                  | Sub-Saharan Africa              | Low income          | 37.27 | 35.93 | 27.36 | 26.63 | 0.73          | -26.59 | -25.88 | 0.71      | -27.22         | 94.5  | 95.4  |
| Cabo Verde               | Sub-Saharan Africa              | Lower middle income | 19.76 | 19.38 | 14.49 | 14.29 | 0.20          | -26.67 | -26.26 | 0.41      | -29.55         | 114.3 | 119.0 |
| Cambodia                 | Southeastern Asia and Oceania   | Low income          | 21.27 | 20.83 | 12.08 | 11.94 | 0.14          | -43.21 | -42.68 | 0.53      | -58.99         | 58.8  | 81.5  |
| Cameroon                 | Sub-Saharan Africa              | Lower middle income | 24.70 | 24.10 | 19.96 | 19.57 | 0.39          | -19.19 | -18.80 | 0.39      | -25.74         | 71.3  | 77.6  |
| Canada                   | Developed region                | High income: OECD   | 3.54  | 3.53  | 3.15  | 3.14  | 0.01          | -11.02 | -11.05 | -0.03     | -13.51         | 95.7  | 98.4  |
| Central African Republic | Sub-Saharan Africa              | Low income          | 38.80 | 37.35 | 35.59 | 34.37 | 1.22          | -8.27  | -7.98  | 0.29      | -12.94         | 79.1  | 83.3  |
| Chad                     | Sub-Saharan Africa              | Low income          | 43.19 | 41.40 | 41.58 | 39.92 | 1.66          | -3.73  | -3.57  | 0.16      | -15.80         | 92.3  | 105.6 |
| Chile                    | Latin America and the Caribbean | High income: OECD   | 3.91  | 3.89  | 3.07  | 3.06  | 0.01          | -21.48 | -21.34 | 0.14      | -14.21         | 68.6  | 62.8  |
| China                    | Eastern Asia                    | Upper middle income | 14.73 | 14.52 | 7.20  | 7.15  | 0.05          | -51.12 | -50.76 | 0.36      | -74.05         | 69.6  | 131.1 |
| Colombia                 | Latin America and the Caribbean | Upper middle income | 11.00 | 10.88 | 8.14  | 8.08  | 0.06          | -26    | -25.74 | 0.26      | -36.97         | 81.7  | 95.9  |
| Comoros                  | Sub-Saharan Africa              | Low income          | 35.69 | 34.46 | 31.51 | 30.55 | 0.96          | -11.71 | -11.35 | 0.36      | -18.70         | 84.9  | 92.2  |
| Congo, Dem. Rep.         | Sub-Saharan Africa              | Low income          | 35.40 | 34.19 | 28.03 | 27.27 | 0.76          | -20.82 | -20.24 | 0.58      | -22.03         | 91.7  | 93.2  |
| Congo, Rep.              | Sub-Saharan Africa              | Lower middle income | 21.49 | 21.04 | 15.29 | 15.06 | 0.23          | -28.85 | -28.42 | 0.43      | -45.71         | 64.7  | 84.8  |
| Cook Islands             | Southeastern Asia and Oceania   | Upper middle income | 11.36 | 11.24 | 6.59  | 6.55  | 0.04          | -41.99 | -41.73 | 0.26      | -28.05         | 118.5 | 95.5  |
| Costa Rica               | Latin America and the Caribbean | Upper middle income | 6.14  | 6.10  | 6.02  | 5.99  | 0.03          | -1.95  | -1.80  | 0.15      | -19.38         | 79.8  | 97.1  |
| Cote d'Ivoire            | Sub-Saharan Africa              | Lower middle income | 32.87 | 31.82 | 27.42 | 26.69 | 0.73          | -16.58 | -16.12 | 0.46      | -23.99         | 65.6  | 71.9  |
| Croatia                  | Developed region                | High income:        | 3.61  | 3.60  | 1.99  | 1.99  | 0.00          | -44.88 | -44.72 | 0.16      | -52.46         | 65.8  | 76.2  |
| Cuba                     | Latin America and the Caribbean | Upper middle income | 11.11 | 10.99 | 6.18  | 6.15  | 0.03          | -44.37 | -44.04 | 0.33      | -45.24         | 264.5 | 268.7 |

|                         |                                 |                     |       |       |       |       |      |        |        |       |        |       |       |
|-------------------------|---------------------------------|---------------------|-------|-------|-------|-------|------|--------|--------|-------|--------|-------|-------|
| Cyprus                  | Developed region                | High income:        | 5.12  | 5.09  | 3.71  | 3.70  | 0.01 | -27.54 | -27.31 | 0.23  | -54.32 | 158   | 250.7 |
| Czech Republic          | Developed region                | High income: OECD   | 3.31  | 3.30  | 2.51  | 2.50  | 0.01 | -24.17 | -24.24 | -0.07 | -53.85 | 84.9  | 139.4 |
| Denmark                 | Developed region                | High income: OECD   | 3.42  | 3.41  | 1.74  | 1.74  | 0.00 | -49.12 | -48.97 | 0.15  | -29.06 | 97.4  | 69.9  |
| Djibouti                | Sub-Saharan Africa              | Lower middle income | 45.71 | 43.71 | 35.85 | 34.61 | 1.24 | -21.57 | -20.82 | 0.75  | -24.36 | 103   | 106.8 |
| Dominica                | Latin America and the Caribbean | Upper middle income | 10.27 | 10.17 | 11.93 | 11.79 | 0.14 | 16.16  | 15.93  | -0.23 | 38.24  | 89.5  | 75.2  |
| Dominican Republic      | Latin America and the Caribbean | Upper middle income | 13.49 | 13.31 | 11.19 | 11.06 | 0.13 | -17.05 | -16.90 | 0.15  | -9.77  | 56.1  | 51.5  |
| Ecuador                 | Latin America and the Caribbean | Upper middle income | 11.03 | 10.91 | 7.74  | 7.68  | 0.06 | -29.83 | -29.61 | 0.22  | -37.51 | 63.9  | 71.8  |
| Egypt, Arab Rep.        | North Africa and Middle East    | Lower middle income | 18.31 | 17.99 | 12.38 | 12.23 | 0.15 | -32.39 | -32.02 | 0.37  | -42.46 | 82.4  | 96.9  |
| El Salvador             | Latin America and the Caribbean | Lower middle income | 17.61 | 17.31 | 12.30 | 12.15 | 0.15 | -30.15 | -29.81 | 0.34  | -42.26 | 122.8 | 148.6 |
| Equatorial Guinea       | Sub-Saharan Africa              | High income:        | 21.62 | 21.16 | 16.44 | 16.18 | 0.26 | -23.96 | -23.53 | 0.43  | -26.00 | 48.2  | 49.5  |
| Eritrea                 | Sub-Saharan Africa              | Low income          | 28.59 | 27.80 | 23.04 | 22.52 | 0.52 | -19.41 | -18.99 | 0.42  | -29.97 | 108.6 | 124.9 |
| Estonia                 | Developed region                | High income: OECD   | 4.25  | 4.24  | 2.67  | 2.66  | 0.01 | -37.18 | -37.26 | -0.08 | -76.40 | 67.8  | 180.4 |
| Ethiopia                | Sub-Saharan Africa              | Low income          | 40.70 | 39.11 | 30.59 | 29.68 | 0.91 | -24.84 | -24.11 | 0.73  | -42.80 | 83.6  | 109.8 |
| Fiji                    | Southeastern Asia and Oceania   | Upper middle income | 14.36 | 14.16 | 12.06 | 11.92 | 0.14 | -16.02 | -15.82 | 0.20  | -31.05 | 103.7 | 126.3 |
| Finland                 | Developed region                | High income: OECD   | 2.65  | 2.65  | 1.85  | 1.85  | 0.00 | -30.19 | -30.19 | 0.00  | -48.00 | 106   | 142.3 |
| France                  | Developed region                | High income: OECD   | 5.49  | 5.46  | 4.74  | 4.72  | 0.02 | -13.66 | -13.55 | 0.11  | -21.43 | 196.1 | 215.5 |
| Gabon                   | Sub-Saharan Africa              | Upper middle income | 17.15 | 16.86 | 14.15 | 13.96 | 0.19 | -17.49 | -17.20 | 0.29  | -22.13 | 57.3  | 60.8  |
| Gambia, The             | Sub-Saharan Africa              | Low income          | 31.72 | 30.74 | 24.44 | 23.86 | 0.58 | -22.95 | -22.38 | 0.57  | -28.50 | 75.5  | 81.3  |
| Georgia                 | Caucasus and Central Asia       | Lower middle income | 18.95 | 18.59 | 11.36 | 11.24 | 0.12 | -40.05 | -39.54 | 0.51  | -65.65 | 90.4  | 157.8 |
| Germany                 | Developed region                | High income: OECD   | 2.67  | 2.66  | 2.43  | 2.43  | 0.00 | -8.99  | -8.65  | 0.34  | -25.00 | 95.4  | 115.7 |
| Ghana                   | Sub-Saharan Africa              | Lower middle income | 30.56 | 29.65 | 23.22 | 22.69 | 0.53 | -24.02 | -23.47 | 0.55  | -22.23 | 83.5  | 81.6  |
| Greece                  | Developed region                | High income: OECD   | 4.74  | 4.71  | 3.57  | 3.56  | 0.01 | -24.68 | -24.42 | 0.26  | -48.39 | 84.6  | 123.5 |
| Grenada                 | Latin America and the Caribbean | Upper middle income | 9.06  | 8.98  | 8.00  | 7.94  | 0.06 | -11.7  | -11.58 | 0.12  | -19.97 | 117.5 | 129.7 |
| Guatemala               | Latin America and the Caribbean | Lower middle income | 17.16 | 16.87 | 12.08 | 11.94 | 0.14 | -29.6  | -29.22 | 0.38  | -35.98 | 82.2  | 90.4  |
| Guinea                  | Sub-Saharan Africa              | Low income          | 27.83 | 27.08 | 21.59 | 21.13 | 0.46 | -22.42 | -21.97 | 0.45  | -35.19 | 57.4  | 68.8  |
| Guinea-Bissau           | Sub-Saharan Africa              | Low income          | 55.43 | 52.52 | 38.10 | 36.70 | 1.40 | -31.26 | -30.12 | 1.14  | -28.65 | 98.9  | 95.3  |
| Guyana                  | Latin America and the Caribbean | Lower middle income | 20.13 | 19.74 | 17.55 | 17.25 | 0.30 | -12.82 | -12.61 | 0.21  | -12.20 | 77    | 76.4  |
| Haiti                   | Latin America and the Caribbean | Low income          | 29.43 | 28.59 | 25.56 | 24.92 | 0.64 | -13.15 | -12.84 | 0.31  | -16.83 | 96.2  | 100.4 |
| Honduras                | Latin America and the Caribbean | Lower middle income | 18.06 | 17.74 | 12.77 | 12.61 | 0.16 | -29.29 | -28.92 | 0.37  | -37.40 | 103   | 116.3 |
| Hungary                 | Developed region                | High income: OECD   | 4.19  | 4.18  | 3.68  | 3.67  | 0.01 | -12.17 | -12.20 | -0.03 | -50.00 | 59.9  | 105.1 |
| Iceland                 | Developed region                | High income: OECD   | 2.89  | 2.88  | 1.13  | 1.12  | 0.01 | -60.9  | -61.11 | -0.21 | -56.04 | 139.6 | 124.2 |
| India                   | Southern Asia                   | Lower middle income | 34.46 | 33.31 | 23.57 | 23.03 | 0.54 | -31.6  | -30.86 | 0.74  | -38.76 | 75.7  | 84.6  |
| Indonesia               | Southeastern Asia and Oceania   | Lower middle income | 17.99 | 17.67 | 13.41 | 13.23 | 0.18 | -25.46 | -25.13 | 0.33  | -39.24 | 81.1  | 99.6  |
| Iran, Islamic Rep.      | Southern Asia                   | Upper middle income | 9.53  | 9.44  | 6.48  | 6.44  | 0.04 | -32    | -31.78 | 0.22  | -50.47 | 49.7  | 68.3  |
| Iraq                    | North Africa and Middle East    | Upper middle income | 19.99 | 19.60 | 15.78 | 15.54 | 0.24 | -21.06 | -20.71 | 0.35  | -24.37 | 81.9  | 85.4  |
| Ireland                 | Developed region                | High income: OECD   | 4.68  | 4.66  | 2.73  | 2.73  | 0.00 | -41.67 | -41.42 | 0.25  | -42.36 | 117.3 | 118.7 |
| Israel                  | Developed region                | High income: OECD   | 4.82  | 4.80  | 4.21  | 4.19  | 0.02 | -12.66 | -12.71 | -0.05 | -41.67 | 133.9 | 200.5 |
| Italy                   | Developed region                | High income: OECD   | 3.98  | 3.96  | 3.35  | 3.34  | 0.01 | -15.83 | -15.66 | 0.17  | -38.24 | 117.1 | 159.5 |
| Jamaica                 | Latin America and the Caribbean | Upper middle income | 21.39 | 20.95 | 19.15 | 18.79 | 0.36 | -10.47 | -10.31 | 0.16  | -31.69 | 125.7 | 164.8 |
| Japan                   | Developed region                | High income: OECD   | 3.07  | 3.06  | 2.08  | 2.07  | 0.01 | -32.25 | -32.35 | -0.10 | -50.00 | 170.6 | 231.1 |
| Jordan                  | North Africa and Middle East    | Upper middle income | 13.14 | 12.97 | 10.60 | 10.48 | 0.12 | -19.33 | -19.20 | 0.13  | -36.13 | 79.3  | 100.1 |
| Kazakhstan              | Caucasus and Central Asia       | Upper middle income | 11.18 | 11.06 | 6.52  | 6.48  | 0.04 | -41.68 | -41.41 | 0.27  | -65.21 | 55.5  | 93.0  |
| Kenya                   | Sub-Saharan Africa              | Lower middle income | 27.16 | 26.44 | 23.02 | 22.50 | 0.52 | -15.24 | -14.90 | 0.34  | -23.48 | 93.2  | 103.3 |
| Kiribati                | Southeastern Asia and Oceania   | Lower middle income | 18.88 | 18.53 | 16.63 | 16.35 | 0.28 | -11.92 | -11.76 | 0.16  | -18.47 | 64.8  | 70.0  |
| Korea, Dem People's Rep | Eastern Asia                    | Low income          | 19.80 | 19.42 | 13.69 | 13.50 | 0.19 | -30.86 | -30.48 | 0.38  | -50.39 | 72.9  | 101.6 |
| Korea, Rep.             | Eastern Asia                    | High income: OECD   | 2.76  | 2.75  | 2.14  | 2.13  | 0.01 | -22.46 | -22.55 | -0.09 | -33.33 | 115   | 133.8 |
| Kuwait                  | North Africa and Middle East    | High income:        | 6.65  | 6.61  | 5.10  | 5.08  | 0.02 | -23.31 | -23.15 | 0.16  | -50.62 | 102.6 | 159.4 |
| Kyrgyz Republic         | Caucasus and Central Asia       | Lower middle income | 13.95 | 13.76 | 10.33 | 10.22 | 0.11 | -25.95 | -25.73 | 0.22  | -47.00 | 64.4  | 90.0  |

|                       |                                 |                     |       |       |       |       |      |        |        |       |        |       |       |
|-----------------------|---------------------------------|---------------------|-------|-------|-------|-------|------|--------|--------|-------|--------|-------|-------|
| Lao PDR               | Southeastern Asia and Oceania   | Lower middle income | 32.68 | 31.64 | 24.30 | 23.72 | 0.58 | -25.64 | -25.03 | 0.61  | -30.50 | 75.1  | 80.4  |
| Latvia                | Developed region                | High income:        | 5.31  | 5.28  | 3.61  | 3.60  | 0.01 | -32.02 | -31.82 | 0.20  | -49.90 | 51.3  | 69.6  |
| Lebanon               | North Africa and Middle East    | Upper middle income | 14.14 | 13.95 | 9.97  | 9.87  | 0.10 | -29.49 | -29.25 | 0.24  | -59.25 | 120   | 207.7 |
| Lesotho               | Sub-Saharan Africa              | Lower middle income | 24.77 | 24.17 | 19.91 | 19.52 | 0.39 | -19.62 | -19.24 | 0.38  | -13.19 | 65.6  | 60.7  |
| Liberia               | Sub-Saharan Africa              | Low income          | 32.51 | 31.49 | 21.88 | 21.42 | 0.46 | -32.7  | -31.98 | 0.72  | -44.58 | 74.7  | 90.7  |
| Libya                 | North Africa and Middle East    | Upper middle income | 12.64 | 12.49 | 8.87  | 8.79  | 0.08 | -29.83 | -29.62 | 0.21  | -52.26 | 83.9  | 123.4 |
| Lithuania             | Developed region                | High income:        | 5.82  | 5.78  | 3.24  | 3.23  | 0.01 | -44.33 | -44.12 | 0.21  | -54.55 | 105.8 | 129.6 |
| Luxembourg            | Developed region                | High income: OECD   | 3.88  | 3.86  | 2.85  | 2.84  | 0.01 | -26.55 | -26.42 | 0.13  | -62.66 | 161   | 316.7 |
| Macedonia, FYR        | Developed region                | Upper middle income | 10.91 | 10.79 | 7.72  | 7.66  | 0.06 | -29.24 | -29.01 | 0.23  | -61.81 | 118.7 | 219.9 |
| Madagascar            | Sub-Saharan Africa              | Low income          | 21.96 | 21.49 | 18.54 | 18.20 | 0.34 | -15.57 | -15.31 | 0.26  | -37.80 | 69.2  | 93.9  |
| Malawi                | Sub-Saharan Africa              | Low income          | 29.57 | 28.72 | 22.30 | 21.82 | 0.48 | -24.59 | -24.03 | 0.56  | -38.77 | 82.9  | 102.1 |
| Malaysia              | Southeastern Asia and Oceania   | Upper middle income | 8.05  | 7.98  | 5.88  | 5.85  | 0.03 | -26.96 | -26.69 | 0.27  | -26.28 | 152.2 | 150.8 |
| Maldives              | Southern Asia                   | Upper middle income | 19.56 | 19.18 | 7.87  | 7.80  | 0.07 | -59.76 | -59.33 | 0.43  | -81.24 | 75.7  | 162.3 |
| Mali                  | Sub-Saharan Africa              | Low income          | 45.98 | 43.96 | 33.63 | 32.53 | 1.10 | -26.86 | -26.00 | 0.86  | -33.53 | 80.6  | 88.6  |
| Malta                 | Developed region                | High income:        | 4.98  | 4.96  | 3.58  | 3.56  | 0.02 | -28.11 | -28.23 | -0.12 | -15.69 | 97.6  | 83.3  |
| Marshall Islands      | Southeastern Asia and Oceania   | Upper middle income | 17.60 | 17.29 | 15.25 | 15.02 | 0.23 | -13.35 | -13.13 | 0.22  | -7.05  | 96.1  | 89.6  |
| Mauritania            | Sub-Saharan Africa              | Lower middle income | 33.60 | 32.51 | 27.82 | 27.07 | 0.75 | -17.2  | -16.73 | 0.47  | -17.11 | 77.7  | 77.6  |
| Mauritius             | Sub-Saharan Africa              | Upper middle income | 13.31 | 13.14 | 9.60  | 9.51  | 0.09 | -27.87 | -27.63 | 0.24  | -31.63 | 108.2 | 114.1 |
| Mexico                | Latin America and the Caribbean | Upper middle income | 7.03  | 6.98  | 5.52  | 5.49  | 0.03 | -21.48 | -21.35 | 0.13  | -30.52 | 69.9  | 79.0  |
| Micronesia, Fed. Sts. | Southeastern Asia and Oceania   | Lower middle income | 21.11 | 20.68 | 18.39 | 18.06 | 0.33 | -12.88 | -12.67 | 0.21  | -27.33 | 82.8  | 99.2  |
| Moldova               | Developed region                | Lower middle income | 10.44 | 10.33 | 7.93  | 7.87  | 0.06 | -24.04 | -23.81 | 0.23  | -42.53 | 50.5  | 66.7  |
| Monaco                | Developed region                | High income:        | 5.60  | 5.57  | 5.70  | 5.67  | 0.01 | 1.79   | 1.80   | 0.01  | -66.67 | 133.3 | 407.1 |
| Mongolia              | Eastern Asia                    | Upper middle income | 12.58 | 12.42 | 7.34  | 7.29  | 0.05 | -41.65 | -41.30 | 0.35  | -56.87 | 48.8  | 66.0  |
| Montenegro            | Developed region                | Upper middle income | 6.00  | 5.96  | 3.99  | 3.97  | 0.02 | -33.5  | -33.39 | 0.11  | -66.59 | 66.6  | 132.6 |
| Morocco               | North Africa and Middle East    | Lower middle income | 34.99 | 33.81 | 25.13 | 24.52 | 0.61 | -28.18 | -27.48 | 0.70  | -36.07 | 126.6 | 142.2 |
| Mozambique            | Sub-Saharan Africa              | Low income          | 27.85 | 27.09 | 19.50 | 19.13 | 0.37 | -29.98 | -29.38 | 0.60  | -38.34 | 63.3  | 71.8  |
| Myanmar               | Southeastern Asia and Oceania   | Lower middle income | 30.69 | 29.78 | 20.36 | 19.96 | 0.40 | -33.66 | -32.98 | 0.68  | -29.33 | 81.8  | 76.7  |
| Namibia               | Sub-Saharan Africa              | Upper middle income | 13.42 | 13.25 | 11.38 | 11.25 | 0.13 | -15.2  | -15.09 | 0.11  | -18.73 | 68.5  | 71.5  |
| Nauru                 | Southeastern Asia and Oceania   | East Asia & Pacific | 18.63 | 18.29 | 15.15 | 14.93 | 0.22 | -18.68 | -18.37 | 0.31  | -1.44  | 83.8  | 69.2  |
| Nepal                 | Southern Asia                   | Low income          | 28.77 | 27.97 | 18.72 | 18.38 | 0.34 | -34.93 | -34.29 | 0.64  | -43.66 | 72.7  | 83.9  |
| Netherlands           | Developed region                | High income: OECD   | 5.31  | 5.28  | 1.83  | 1.82  | 0.01 | -65.54 | -65.53 | 0.01  | -36.84 | 139.7 | 76.3  |
| New Zealand           | Developed region                | High income: OECD   | 3.46  | 3.45  | 2.26  | 2.25  | 0.01 | -34.68 | -34.78 | -0.10 | -11.71 | 98.9  | 73.1  |
| Nicaragua             | Latin America and the Caribbean | Lower middle income | 11.02 | 10.90 | 7.50  | 7.44  | 0.06 | -31.94 | -31.74 | 0.20  | -42.90 | 64.4  | 76.8  |
| Niger                 | Sub-Saharan Africa              | Low income          | 40.62 | 39.04 | 38.07 | 36.67 | 1.40 | -6.28  | -6.07  | 0.21  | -38.19 | 93.5  | 141.8 |
| Nigeria               | Sub-Saharan Africa              | Lower middle income | 55.17 | 52.29 | 44.81 | 42.89 | 1.92 | -18.78 | -17.98 | 0.80  | -28.87 | 114.1 | 130.3 |
| Norway                | Developed region                | High income: OECD   | 3.72  | 3.71  | 2.19  | 2.19  | 0.00 | -41.13 | -40.97 | 0.16  | -44.61 | 138.3 | 147.0 |
| Oman                  | North Africa and Middle East    | High income:        | 9.99  | 9.90  | 8.51  | 8.44  | 0.07 | -14.81 | -14.75 | 0.06  | -30.67 | 133.2 | 163.7 |
| Pakistan              | Southern Asia                   | Lower middle income | 56.35 | 53.34 | 45.09 | 43.15 | 1.94 | -19.98 | -19.10 | 0.88  | -24.91 | 92.1  | 98.2  |
| Palau                 | Southeastern Asia and Oceania   | Upper middle income | 10.95 | 10.83 | 9.01  | 8.93  | 0.08 | -17.72 | -17.54 | 0.18  | -30.32 | 71.7  | 84.7  |
| Panama                | Latin America and the Caribbean | Upper middle income | 8.77  | 8.69  | 6.18  | 6.14  | 0.04 | -29.53 | -29.34 | 0.19  | -34.56 | 59.8  | 64.4  |
| Papua New Guinea      | Southeastern Asia and Oceania   | Lower middle income | 19.21 | 18.85 | 16.17 | 15.91 | 0.26 | -15.83 | -15.60 | 0.23  | -18.62 | 63.6  | 65.8  |
| Paraguay              | Latin America and the Caribbean | Upper middle income | 19.19 | 18.83 | 13.57 | 13.39 | 0.18 | -29.29 | -28.89 | 0.40  | -38.36 | 108.7 | 124.7 |
| Peru                  | Latin America and the Caribbean | Upper middle income | 13.92 | 13.73 | 9.03  | 8.95  | 0.08 | -35.13 | -34.81 | 0.32  | -47.93 | 88.5  | 110.3 |
| Philippines           | Southeastern Asia and Oceania   | Lower middle income | 14.53 | 14.33 | 10.99 | 10.87 | 0.12 | -24.36 | -24.15 | 0.21  | -24.97 | 86.8  | 87.5  |
| Poland                | Developed region                | High income: OECD   | 4.69  | 4.67  | 2.35  | 2.35  | 0.00 | -49.89 | -49.68 | 0.21  | -46.55 | 80.9  | 75.8  |
| Portugal              | Developed region                | High income: OECD   | 3.70  | 3.69  | 2.18  | 2.17  | 0.01 | -41.08 | -41.19 | -0.11 | -41.18 | 108.8 | 109.0 |
| Qatar                 | North Africa and Middle East    | High income:        | 7.58  | 7.53  | 5.75  | 5.72  | 0.03 | -24.14 | -24.04 | 0.10  | -41.18 | 117.3 | 151.3 |
| Romania               | Developed region                | Upper middle income | 6.80  | 6.76  | 4.15  | 4.13  | 0.02 | -38.97 | -38.91 | 0.06  | -51.84 | 52.1  | 66.0  |

|                         |                                 |                     |       |       |       |       |      |        |        |       |        |       |       |
|-------------------------|---------------------------------|---------------------|-------|-------|-------|-------|------|--------|--------|-------|--------|-------|-------|
| Russian Federation      | Developed region                | High income:        | 7.75  | 7.69  | 4.49  | 4.47  | 0.02 | -42.06 | -41.87 | 0.19  | -59.94 | 62.1  | 89.8  |
| Rwanda                  | Sub-Saharan Africa              | Low income          | 27.82 | 27.07 | 17.59 | 17.29 | 0.30 | -36.77 | -36.13 | 0.64  | -55.60 | 65.8  | 93.8  |
| Samoa                   | Southeastern Asia and Oceania   | Lower middle income | 12.10 | 11.95 | 11.05 | 10.93 | 0.12 | -8.68  | -8.54  | 0.14  | -18.26 | 104.2 | 116.4 |
| San Marino              | Developed region                | High income:        | 4.90  | 4.88  | 2.60  | 2.59  | 0.01 | -46.94 | -46.93 | 0.01  | -46.15 | 376.9 | 371.4 |
| Sao Tome and Principe   | Sub-Saharan Africa              | Lower middle income | 24.88 | 24.28 | 16.47 | 16.21 | 0.26 | -33.8  | -33.24 | 0.56  | -29.71 | 101.6 | 95.6  |
| Saudi Arabia            | North Africa and Middle East    | High income         | 19.22 | 18.86 | 14.13 | 13.93 | 0.20 | -26.48 | -26.14 | 0.34  | -36.27 | 155.3 | 179.1 |
| Senegal                 | Sub-Saharan Africa              | Lower middle income | 35.89 | 34.65 | 25.09 | 24.47 | 0.62 | -30.09 | -29.38 | 0.71  | -46.73 | 91.7  | 120.4 |
| Serbia                  | Developed region                | Upper middle income | 7.84  | 7.78  | 5.98  | 5.95  | 0.03 | -23.72 | -23.52 | 0.20  | -45.45 | 101.8 | 142.4 |
| Seychelles              | Sub-Saharan Africa              | High income         | 11.32 | 11.20 | 9.83  | 9.73  | 0.10 | -13.16 | -13.13 | 0.03  | -12.96 | 120.3 | 120.0 |
| Sierra Leone            | Sub-Saharan Africa              | Low income          | 40.71 | 39.12 | 24.96 | 24.36 | 0.60 | -38.69 | -37.73 | 0.96  | -30.04 | 81.6  | 71.6  |
| Singapore               | Southeastern Asia and Oceania   | High income:        | 3.53  | 3.52  | 2.58  | 2.58  | 0.00 | -26.91 | -26.70 | 0.21  | -38.13 | 220.6 | 260.6 |
| Slovak Republic         | Developed region                | High income: OECD   | 3.91  | 3.89  | 2.94  | 2.93  | 0.01 | -24.81 | -24.68 | 0.13  | -42.68 | 53.5  | 70.2  |
| Slovenia                | Developed region                | High income: OECD   | 2.70  | 2.70  | 2.85  | 2.84  | 0.01 | 5.56   | 5.19   | -0.37 | -57.10 | 81.6  | 200.7 |
| Solomon Islands         | Southeastern Asia and Oceania   | Lower middle income | 20.04 | 19.65 | 17.91 | 17.59 | 0.32 | -10.63 | -10.48 | 0.15  | -15.71 | 139.3 | 147.7 |
| Somalia                 | Sub-Saharan Africa              | Low income          | 40.82 | 39.22 | 36.80 | 35.49 | 1.31 | -9.85  | -9.51  | 0.34  | -10.62 | 91.7  | 92.5  |
| South Africa            | Sub-Saharan Africa              | Upper middle income | 22.94 | 22.42 | 17.76 | 17.45 | 0.31 | -22.58 | -22.17 | 0.41  | -31.16 | 143.8 | 161.7 |
| South Sudan             | Sub-Saharan Africa              | Low income          | 37.28 | 35.94 | 30.98 | 30.05 | 0.93 | -16.9  | -16.39 | 0.51  | -31.60 | 64.4  | 78.3  |
| Spain                   | Developed region                | High income: OECD   | 3.31  | 3.30  | 2.88  | 2.87  | 0.01 | -12.99 | -13.03 | -0.04 | -30.00 | 82.8  | 102.9 |
| Sri Lanka               | Southern Asia                   | Lower middle income | 7.60  | 7.54  | 4.91  | 4.89  | 0.02 | -35.39 | -35.15 | 0.24  | -46.48 | 75.3  | 90.9  |
| St. Kitts and Nevis     | Latin America and the Caribbean | High income:        | 9.67  | 9.58  | 7.58  | 7.53  | 0.05 | -21.61 | -21.40 | 0.21  | -47.50 | 80.6  | 120.3 |
| St. Lucia               | Latin America and the Caribbean | Upper middle income | 13.18 | 13.00 | 12.16 | 12.01 | 0.15 | -7.74  | -7.62  | 0.12  | -18.42 | 117.3 | 132.6 |
| St Vincent & Grenadines | Latin America and the Caribbean | Upper middle income | 12.57 | 12.41 | 10.90 | 10.78 | 0.12 | -13.29 | -13.13 | 0.16  | -13.99 | 92.6  | 93.3  |
| Sudan                   | Sub-Saharan Africa              | Lower middle income | 30.09 | 29.21 | 24.99 | 24.38 | 0.61 | -16.95 | -16.54 | 0.41  | -16.20 | 84.2  | 83.4  |
| Suriname                | Latin America and the Caribbean | Upper middle income | 24.64 | 24.05 | 19.82 | 19.43 | 0.39 | -19.56 | -19.21 | 0.35  | -38.26 | 133   | 173.3 |
| Swaziland               | Sub-Saharan Africa              | Lower middle income | 16.20 | 15.94 | 12.50 | 12.35 | 0.15 | -22.84 | -22.52 | 0.32  | -33.08 | 76.6  | 88.3  |
| Sweden                  | Developed region                | High income: OECD   | 3.81  | 3.80  | 2.86  | 2.85  | 0.01 | -24.93 | -25.00 | -0.07 | -30.13 | 166.4 | 178.8 |
| Switzerland             | Developed region                | High income: OECD   | 3.25  | 3.24  | 2.82  | 2.81  | 0.01 | -13.23 | -13.27 | -0.04 | -22.86 | 92.9  | 104.4 |
| Syrian Arab Republic    | North Africa and Middle East    | Lower middle income | 14.75 | 14.53 | 11.27 | 11.15 | 0.12 | -23.59 | -23.26 | 0.33  | -43.54 | 119.1 | 161.2 |
| Tajikistan              | Caucasus and Central Asia       | Lower middle income | 19.36 | 18.99 | 14.18 | 13.98 | 0.20 | -26.76 | -26.38 | 0.38  | -31.70 | 64.3  | 69.0  |
| Tanzania                | Sub-Saharan Africa              | Low income          | 32.68 | 31.65 | 22.94 | 22.42 | 0.52 | -29.8  | -29.16 | 0.64  | -41.09 | 102.2 | 121.8 |
| Thailand                | Southeastern Asia and Oceania   | Upper middle income | 7.74  | 7.68  | 5.00  | 4.97  | 0.03 | -35.4  | -35.29 | 0.11  | -47.24 | 61    | 74.7  |
| Timor-Leste             | Southeastern Asia and Oceania   | Lower middle income | 27.01 | 26.30 | 18.10 | 17.78 | 0.32 | -32.99 | -32.40 | 0.59  | -40.32 | 72.1  | 81.0  |
| Togo                    | Sub-Saharan Africa              | Low income          | 46.24 | 44.20 | 35.36 | 34.15 | 1.21 | -23.53 | -22.74 | 0.79  | -25.82 | 128.1 | 132.1 |
| Tonga                   | Southeastern Asia and Oceania   | Upper middle income | 9.60  | 9.51  | 8.93  | 8.85  | 0.08 | -6.98  | -6.94  | 0.04  | -10.05 | 130.4 | 134.9 |
| Trinidad and Tobago     | Latin America and the Caribbean | High income:        | 17.94 | 17.62 | 11.24 | 11.11 | 0.13 | -37.35 | -36.95 | 0.40  | -29.50 | 96    | 85.3  |
| Tunisia                 | North Africa and Middle East    | Upper middle income | 15.01 | 14.78 | 9.25  | 9.16  | 0.09 | -38.37 | -38.02 | 0.35  | -55.42 | 81.7  | 112.9 |
| Turkey                  | North Africa and Middle East    | Upper middle income | 12.91 | 12.75 | 7.05  | 7.00  | 0.05 | -45.39 | -45.10 | 0.29  | -64.62 | 64.4  | 99.4  |
| Turkmenistan            | Caucasus and Central Asia       | Upper middle income | 22.96 | 22.45 | 17.31 | 17.02 | 0.29 | -24.61 | -24.19 | 0.42  | -25.74 | 76    | 77.1  |
| Tuvalu                  | Southeastern Asia and Oceania   | Upper middle income | 18.05 | 17.73 | 13.22 | 13.04 | 0.18 | -26.76 | -26.45 | 0.31  | -23.82 | 75.3  | 72.4  |
| Uganda                  | Sub-Saharan Africa              | Low income          | 30.25 | 29.36 | 21.48 | 21.02 | 0.46 | -28.99 | -28.41 | 0.58  | -42.23 | 93.3  | 114.7 |
| Ukraine                 | Developed region                | Lower middle income | 12.50 | 12.34 | 8.88  | 8.81  | 0.07 | -28.96 | -28.61 | 0.35  | -50.85 | 111.7 | 161.5 |
| United Arab Emirates    | North Africa and Middle East    | High income:        | 8.98  | 8.90  | 7.42  | 7.37  | 0.05 | -17.37 | -17.19 | 0.18  | -37.39 | 160.6 | 212.0 |
| United Kingdom          | Developed region                | High income: OECD   | 3.67  | 3.66  | 2.95  | 2.94  | 0.01 | -19.62 | -19.67 | -0.05 | -36.84 | 96.6  | 122.9 |
| United States           | Developed region                | High income: OECD   | 3.12  | 3.11  | 2.96  | 2.95  | 0.01 | -5.13  | -5.14  | -0.01 | -21.74 | 67.8  | 82.2  |
| Uruguay                 | Latin America and the Caribbean | High income         | 8.57  | 8.50  | 6.59  | 6.55  | 0.04 | -23.1  | -22.94 | 0.16  | -39.02 | 102.3 | 129.0 |
| Uzbekistan              | Caucasus and Central Asia       | Lower middle income | 15.88 | 15.63 | 12.19 | 12.04 | 0.15 | -23.24 | -22.97 | 0.27  | -29.42 | 55.2  | 60.0  |
| Vanuatu                 | Southeastern Asia and Oceania   | Lower middle income | 14.37 | 14.17 | 14.10 | 13.90 | 0.20 | -1.88  | -1.91  | -0.03 | -4.36  | 118.3 | 121.3 |
| Venezuela, RB           | Latin America and the Caribbean | High income         | 9.03  | 8.95  | 7.18  | 7.13  | 0.05 | -20.49 | -20.34 | 0.15  | -25.79 | 75.4  | 80.8  |

|                    |                               |                     |       |       |       |       |      |        |        |       |        |       |       |
|--------------------|-------------------------------|---------------------|-------|-------|-------|-------|------|--------|--------|-------|--------|-------|-------|
| Vietnam            | Southeastern Asia and Oceania | Lower middle income | 15.25 | 15.02 | 10.25 | 10.15 | 0.10 | -32.79 | -32.42 | 0.37  | -27.28 | 97.4  | 90.1  |
| West Bank and Gaza | North Africa and Middle East  | Lower middle income | 9.72  | 9.62  | 7.54  | 7.48  | 0.06 | -22.43 | -22.25 | 0.18  | -28.04 | 59.4  | 64.0  |
| Yemen, Rep.        | North Africa and Middle East  | Lower middle income | 38.01 | 36.62 | 29.87 | 29.00 | 0.87 | -21.42 | -20.81 | 0.61  | -40.94 | 101.2 | 134.6 |
| Zambia             | Sub-Saharan Africa            | Lower middle income | 27.02 | 26.31 | 21.30 | 20.86 | 0.44 | -21.17 | -20.71 | 0.46  | -37.67 | 78.5  | 99.3  |
| Zimbabwe           | Sub-Saharan Africa            | Low income          | 20.35 | 19.94 | 21.04 | 20.61 | 0.43 | 3.39   | 3.36   | -0.03 | 12.41  | 97.1  | 89.3  |

Notes: SLBR and STBR stand for still live and total birth rates, SB for the number stillborn, and NM and NMR for the number and rate of neonatal mortality. The STBR is from Blencowe et al. (2016), SLBR is derived by using the number stillborn from Blencowe et al. (2016) and number of live births as calculated by using the neonatal mortality number and rate from World Development Indicators. Niue (population 1,190 in July 2014 per CIA World Fact Book) for which Blencowe et al. (2016) give the rate but not the number stillborn is excluded from the above table. The neonatal mortality rate and numbers for Cook Islands were obtained from Child Mortality Estimates by the UN Inter-agency Group. Income groups are as defined by the World Bank
