# Supplementary material for: Stillbirths: how should its rate be reported, its disability-adjusted-life-years (DALY), and stillbirths adjusted life expectancy
Source: Springer Nature journal article supplement (doi:10.1186/s12911-019-0850-8), 2019-07-16
Supplement: MOESM3 [file 16937744]

**Additional file 3: Life expectancy & stillbirths adjusted life expectancy, 2000 & 2015, and i) decrease in life expectancy due to stillbirths, and ii)**

**DALY = YLL of stillbirths, 2015, by country**

| Country name             | SLBR  |       | 2000  |       | 2015  |       | DALY=YLL | % Δ 2000-2015 |       |       |        |
|--------------------------|-------|-------|-------|-------|-------|-------|----------|---------------|-------|-------|--------|
|                          | 2000  | 2015  | LE    | SALE  | LE    | SALE  |          | SALE-LE       | 2015  | LE    | SALE   |
| Afghanistan              | 37.01 | 27.48 | 55.13 | 53.16 | 60.72 | 59.10 | 1.62     | 1646853       | 10.14 | 11.17 | -17.77 |
| Albania                  | 5.79  | 4.00  | 74.27 | 73.84 | 78.01 | 77.70 | 0.31     | 13987         | 5.04  | 5.23  | -27.91 |
| Algeria                  | 26.70 | 19.70 | 70.18 | 68.35 | 75.04 | 73.59 | 1.45     | 1383723       | 6.93  | 7.67  | -20.77 |
| Angola                   | 35.49 | 28.08 | 45.2  | 43.65 | 52.67 | 51.23 | 1.44     | 1564366       | 16.53 | 17.37 | -7.10  |
| Antigua & Barbuda        | 8.77  | 7.00  | 73.4  | 72.76 | 76.1  | 75.57 | 0.53     | 823           | 3.68  | 3.86  | -17.19 |
| Argentina                | 7.37  | 4.60  | 73.76 | 73.22 | 76.33 | 75.98 | 0.35     | 266883        | 3.48  | 3.77  | -35.19 |
| Armenia                  | 21.48 | 13.96 | 71.28 | 69.78 | 74.8  | 73.77 | 1.03     | 41935         | 4.94  | 5.72  | -31.33 |
| Australia                | 3.37  | 2.72  | 79.23 | 78.96 | 82.45 | 82.23 | 0.22     | 65707         | 4.06  | 4.14  | -18.52 |
| Austria                  | 4.67  | 3.64  | 78.13 | 77.77 | 81.84 | 81.54 | 0.30     | 24724         | 4.75  | 4.85  | -16.67 |
| Azerbaijan               | 25.85 | 16.74 | 66.76 | 65.08 | 70.85 | 69.68 | 1.17     | 273378        | 6.13  | 7.07  | -30.36 |
| Bahamas, The             | 11.27 | 10.35 | 72.25 | 71.44 | 75.4  | 74.63 | 0.77     | 4434          | 4.36  | 4.47  | -4.94  |
| Bahrain                  | 9.48  | 5.55  | 74.6  | 73.90 | 76.82 | 76.40 | 0.42     | 9113          | 2.98  | 3.38  | -40.00 |
| Bangladesh               | 44.22 | 26.02 | 65.35 | 62.58 | 72    | 70.17 | 1.83     | 5810578       | 10.18 | 12.13 | -33.94 |
| Barbados                 | 9.28  | 8.59  | 73.22 | 72.55 | 75.66 | 75.02 | 0.64     | 2187          | 3.33  | 3.40  | -4.48  |
| Belarus                  | 5.66  | 2.97  | 68.91 | 68.52 | 73.62 | 73.40 | 0.22     | 27694         | 6.84  | 7.12  | -43.59 |
| Belgium                  | 3.55  | 3.02  | 77.72 | 77.45 | 81.29 | 81.05 | 0.24     | 30327         | 4.59  | 4.65  | -11.11 |
| Belize                   | 11.29 | 9.84  | 68.42 | 67.66 | 70.19 | 69.51 | 0.68     | 5747          | 2.59  | 2.73  | -10.53 |
| Benin                    | 37.46 | 31.24 | 55.19 | 53.20 | 59.72 | 57.91 | 1.81     | 678582        | 8.21  | 8.85  | -9.05  |
| Bhutan                   | 27.59 | 16.19 | 60.65 | 59.02 | 69.83 | 68.72 | 1.11     | 13671         | 15.14 | 16.44 | -31.90 |
| Bolivia                  | 18.06 | 13.04 | 60.69 | 59.61 | 68.74 | 67.86 | 0.88     | 215802        | 13.26 | 13.84 | -18.52 |
| Bosnia and Herze.        | 6.74  | 5.48  | 74.26 | 73.76 | 76.59 | 76.17 | 0.42     | 13094         | 3.14  | 3.27  | -16.00 |
| Botswana                 | 17.84 | 15.46 | 48.69 | 47.84 | 64.49 | 63.51 | 0.98     | 56519         | 32.45 | 32.76 | 15.29  |
| Brazil                   | 12.24 | 8.65  | 70.04 | 69.19 | 74.68 | 74.04 | 0.64     | 2060055       | 6.62  | 7.01  | -24.71 |
| Brunei Darussalam        | 6.98  | 6.52  | 75.29 | 74.77 | 79.04 | 78.53 | 0.51     | 3914          | 4.98  | 5.03  | -1.92  |
| Bulgaria                 | 8.54  | 5.77  | 71.66 | 71.05 | 74.47 | 74.04 | 0.43     | 25754         | 3.92  | 4.21  | -29.51 |
| Burkina Faso             | 30.25 | 21.70 | 50.35 | 48.87 | 58.93 | 57.68 | 1.25     | 858169        | 17.04 | 18.03 | -15.54 |
| Burundi                  | 37.27 | 27.36 | 51.49 | 49.64 | 57.11 | 55.59 | 1.52     | 701167        | 10.91 | 11.99 | -17.84 |
| Cabo Verde               | 19.76 | 14.49 | 69.72 | 68.37 | 73.36 | 72.31 | 1.05     | 11464         | 5.22  | 5.76  | -22.22 |
| Cambodia                 | 21.27 | 12.08 | 58.35 | 57.13 | 68.66 | 67.84 | 0.82     | 291967        | 17.67 | 18.75 | -32.79 |
| Cameroon                 | 24.70 | 19.96 | 51.94 | 50.69 | 55.93 | 54.84 | 1.09     | 892654        | 7.68  | 8.19  | -12.80 |
| Canada                   | 3.54  | 3.15  | 79.24 | 78.96 | 82.14 | 81.88 | 0.26     | 95958         | 3.66  | 3.70  | -7.14  |
| Central African Republic | 38.80 | 35.59 |       |       |       |       | 1.77     | 289797        | 15.29 | 15.65 | 5.99   |
| Chad                     | 43.19 | 41.58 | 47.58 | 45.61 | 51.87 | 49.80 | 2.07     | 1250158       | 9.02  | 9.19  | 5.08   |
| Chile                    | 3.91  | 3.07  | 76.82 | 76.52 | 81.79 | 81.54 | 0.25     | 58429         | 6.47  | 6.56  | -16.67 |
| China                    | 14.73 | 7.20  | 71.73 | 70.69 | 75.99 | 75.45 | 0.54     | 9182935       | 5.94  | 6.73  | -48.08 |
| Colombia                 | 11.00 | 8.14  | 70.99 | 70.22 | 74.18 | 73.58 | 0.60     | 449250        | 4.49  | 4.78  | -22.08 |
| Comoros                  | 35.69 | 31.51 | 59.44 | 57.39 | 63.55 | 61.61 | 1.94     | 50454         | 6.91  | 7.35  | -5.37  |
| Congo, Dem. Rep.         | 35.40 | 28.03 | 50    | 48.29 | 59.02 | 57.41 | 1.61     | 5042628       | 18.04 | 18.89 | -5.85  |
| Congo, Rep.              | 21.49 | 15.29 | 50.59 | 49.53 | 62.87 | 61.92 | 0.95     | 155262        | 24.27 | 25.02 | -10.38 |
| Costa Rica               | 6.14  | 6.02  | 77.42 | 76.95 | 79.59 | 79.11 | 0.48     | 32583         | 2.80  | 2.81  | 2.13   |
| Cote d'Ivoire            | 32.87 | 27.42 | 46.7  | 45.21 | 51.92 | 50.53 | 1.39     | 1147856       | 11.18 | 11.77 | -6.71  |
| Croatia                  | 3.61  | 1.99  | 72.81 | 72.55 | 77.28 | 77.13 | 0.15     | 5625          | 6.14  | 6.31  | -42.31 |
| Cuba                     | 11.11 | 6.18  | 76.64 | 75.80 | 79.55 | 79.06 | 0.49     | 57452         | 3.80  | 4.30  | -41.67 |
| Cyprus                   | 5.12  | 3.71  | 77.97 | 77.57 | 80.31 | 80.01 | 0.30     | 3840          | 3.00  | 3.15  | -25.00 |
| Czech Republic           | 3.31  | 2.51  | 74.97 | 74.72 | 79.47 | 79.27 | 0.20     | 18714         | 6.00  | 6.09  | -20.00 |
| Denmark                  | 3.42  | 1.74  | 76.59 | 76.33 | 81.1  | 80.96 | 0.14     | 7241          | 5.89  | 6.07  | -46.15 |
| Djibouti                 | 45.71 | 35.85 | 57.01 | 54.52 | 62.29 | 60.13 | 2.16     | 47425         | 9.26  | 10.29 | -13.25 |
| Dominican Republic       | 13.49 | 11.19 | 70.63 | 69.69 | 73.68 | 72.86 | 0.82     | 177783        | 4.32  | 4.55  | -12.77 |
| Ecuador                  | 11.03 | 7.74  | 72.94 | 72.14 | 76.1  | 75.52 | 0.58     | 189981        | 4.33  | 4.69  | -27.50 |
| Egypt, Arab Rep.         | 18.31 | 12.38 | 68.59 | 67.36 | 71.32 | 70.45 | 0.87     | 2439171       | 3.98  | 4.59  | -29.27 |
| El Salvador              | 17.61 | 12.30 | 68.72 | 67.53 | 73    | 72.11 | 0.89     | 93265         | 6.23  | 6.78  | -25.21 |
| Equatorial Guinea        | 21.62 | 16.44 | 52.11 | 51.01 | 57.96 | 57.02 | 0.94     | 26739         | 11.23 | 11.78 | -14.55 |
| Eritrea                  | 28.59 | 23.04 | 56.03 | 54.47 | 64.1  | 62.66 | 1.44     | 238677        | 14.40 | 15.04 | -7.69  |
| Estonia                  | 4.25  | 2.67  | 70.42 | 70.12 | 77.13 | 76.92 | 0.21     | 2557          | 9.53  | 9.70  | -30.00 |
| Ethiopia                 | 40.70 | 30.59 | 51.93 | 49.90 | 64.58 | 62.66 | 1.92     | 6026527       | 24.36 | 25.57 | -5.42  |
| Fiji                     | 14.36 | 12.06 | 67.61 | 66.65 | 70.26 | 69.42 | 0.84     | 14425         | 3.92  | 4.16  | -12.50 |
| Finland                  | 2.65  | 1.85  | 77.47 | 77.27 | 81.39 | 81.24 | 0.15     | 8684          | 5.06  | 5.14  | -25.00 |
| France                   | 5.49  | 4.74  | 79.06 | 78.63 | 82.67 | 82.28 | 0.39     | 306094        | 4.57  | 4.64  | -9.30  |
| Gabon                    | 17.15 | 14.15 | 59.34 | 58.34 | 64.89 | 63.98 | 0.91     | 46685         | 9.35  | 9.67  | -9.00  |
| Gambia, The              | 31.72 | 24.44 | 55.58 | 53.87 | 60.47 | 59.03 | 1.44     | 118387        | 8.80  | 9.58  | -15.79 |
| Georgia                  | 18.95 | 11.36 | 71.62 | 70.29 | 74.82 | 73.98 | 0.84     | 47626         | 4.47  | 5.25  | -36.84 |
| Germany                  | 2.67  | 2.43  | 77.93 | 77.72 | 81.09 | 80.89 | 0.20     | 138065        | 4.05  | 4.08  | -4.76  |
| Ghana                    | 30.56 | 23.22 | 56.99 | 55.30 | 61.49 | 60.09 | 1.40     | 1249892       | 7.90  | 8.66  | -17.16 |
| Greece                   | 4.74  | 3.57  | 77.89 | 77.52 | 81.59 | 81.30 | 0.29     | 30772         | 4.75  | 4.88  | -21.62 |
| Grenada                  | 9.06  | 8.00  | 70.25 | 69.62 | 73.52 | 72.94 | 0.58     | 1128          | 4.65  | 4.77  | -7.94  |

|                       |       |       |       |       |       |       |      |          |       |       |        |
|-----------------------|-------|-------|-------|-------|-------|-------|------|----------|-------|-------|--------|
| Guatemala             | 17.16 | 12.08 | 67.74 | 66.60 | 71.96 | 71.10 | 0.86 | 382859   | 6.23  | 6.76  | -24.56 |
| Guinea                | 27.83 | 21.59 | 51.24 | 49.85 | 59.19 | 57.94 | 1.25 | 568791   | 15.52 | 16.23 | -10.07 |
| Guinea-Bissau         | 55.43 | 38.10 | 51.45 | 48.75 | 55.47 | 53.43 | 2.04 | 131872   | 7.81  | 9.60  | -24.44 |
| Guyana                | 20.13 | 17.55 | 64.97 | 63.69 | 66.51 | 65.36 | 1.15 | 19586    | 2.37  | 2.62  | -10.16 |
| Haiti                 | 29.43 | 25.56 | 57.68 | 56.03 | 63.07 | 61.50 | 1.57 | 403237   | 9.34  | 9.76  | -4.85  |
| Honduras              | 18.06 | 12.77 | 70.49 | 69.24 | 73.33 | 72.41 | 0.92 | 149738   | 4.03  | 4.58  | -26.40 |
| Hungary               | 4.19  | 3.68  | 71.25 | 70.95 | 75.96 | 75.68 | 0.28 | 24355    | 6.61  | 6.67  | -6.67  |
| Iceland               | 2.89  | 1.13  | 79.65 | 79.42 | 82.86 | 82.77 | 0.09 | 394      | 4.03  | 4.22  | -60.87 |
| India                 | 34.46 | 23.57 | 62.63 | 60.54 | 68.35 | 66.78 | 1.57 | 39200456 | 9.13  | 10.31 | -24.88 |
| Indonesia             | 17.99 | 13.41 | 66.25 | 65.08 | 69.07 | 68.16 | 0.91 | 4995741  | 4.26  | 4.73  | -22.22 |
| Iran, Islamic Rep.    | 9.53  | 6.48  | 70.14 | 69.48 | 75.59 | 75.10 | 0.49 | 660659   | 7.77  | 8.09  | -25.76 |
| Iraq                  | 19.99 | 15.78 | 69.18 | 67.82 | 69.59 | 68.51 | 1.08 | 1314666  | 0.59  | 1.02  | -20.59 |
| Ireland               | 4.68  | 2.73  | 76.54 | 76.18 | 81.5  | 81.28 | 0.22 | 14740    | 6.48  | 6.69  | -38.89 |
| Israel                | 4.82  | 4.21  | 78.95 | 78.57 | 82.05 | 81.71 | 0.34 | 59606    | 3.93  | 4.00  | -10.53 |
| Italy                 | 3.98  | 3.35  | 79.78 | 79.46 | 83.49 | 83.21 | 0.28 | 133048   | 4.65  | 4.72  | -12.50 |
| Jamaica               | 21.39 | 19.15 | 72.31 | 70.80 | 75.8  | 74.38 | 1.42 | 56695    | 4.83  | 5.06  | -5.96  |
| Japan                 | 3.07  | 2.08  | 81.08 | 80.83 | 83.84 | 83.67 | 0.17 | 177905   | 3.40  | 3.51  | -32.00 |
| Jordan                | 13.14 | 10.60 | 71.78 | 70.85 | 74.2  | 73.42 | 0.78 | 160863   | 3.37  | 3.63  | -16.13 |
| Kazakhstan            | 11.18 | 6.52  | 65.52 | 64.80 | 72    | 71.53 | 0.47 | 184083   | 9.89  | 10.39 | -34.72 |
| Kenya                 | 27.16 | 23.02 | 50.79 | 49.45 | 62.13 | 60.73 | 1.40 | 2119678  | 22.33 | 22.81 | 4.48   |
| Kiribati              | 18.88 | 16.63 | 63.95 | 62.76 | 66.15 | 65.07 | 1.08 | 3047     | 3.44  | 3.68  | -9.24  |
| Korea, Dem. P. Rep    | 19.80 | 13.69 | 64.98 | 63.72 | 70.34 | 69.39 | 0.95 | 358782   | 8.25  | 8.90  | -24.60 |
| Korea, Rep.           | 2.76  | 2.14  | 75.84 | 75.63 | 82.16 | 81.98 | 0.18 | 82490    | 8.33  | 8.40  | -14.29 |
| Kuwait                | 6.65  | 5.10  | 73.31 | 72.83 | 74.7  | 74.32 | 0.38 | 26392    | 1.90  | 2.05  | -20.83 |
| Kyrgyz Republic       | 13.95 | 10.33 | 68.56 | 67.62 | 70.65 | 69.93 | 0.72 | 124522   | 3.05  | 3.42  | -23.40 |
| Lao PDR               | 32.68 | 24.30 | 58.88 | 57.02 | 66.54 | 64.96 | 1.58 | 272714   | 13.01 | 13.92 | -15.05 |
| Latvia                | 5.31  | 3.61  | 70.31 | 69.94 | 74.12 | 73.85 | 0.27 | 4265     | 5.42  | 5.59  | -27.03 |
| Lebanon               | 14.14 | 9.97  | 74.43 | 73.39 | 79.63 | 78.84 | 0.79 | 80781    | 6.99  | 7.43  | -24.04 |
| Lesotho               | 24.77 | 19.91 | 47.18 | 46.04 | 49.96 | 48.98 | 0.98 | 61136    | 5.89  | 6.39  | -14.04 |
| Liberia               | 32.51 | 21.88 | 52.41 | 50.76 | 61.16 | 59.85 | 1.31 | 197840   | 16.70 | 17.91 | -20.61 |
| Libya                 | 12.64 | 8.87  | 70.57 | 69.69 | 71.83 | 71.20 | 0.63 | 78363    | 1.79  | 2.17  | -28.41 |
| Lithuania             | 5.82  | 3.24  | 72.02 | 71.60 | 75.12 | 74.88 | 0.24 | 7782     | 4.30  | 4.58  | -42.86 |
| Luxembourg            | 3.88  | 2.85  | 77.87 | 77.57 | 82.23 | 82.00 | 0.23 | 1533     | 5.60  | 5.71  | -23.33 |
| Macedonia, FYR        | 10.91 | 7.72  | 73.24 | 72.45 | 75.5  | 74.92 | 0.58 | 14379    | 3.09  | 3.41  | -26.58 |
| Madagascar            | 21.96 | 18.54 | 58.47 | 57.21 | 65.48 | 64.29 | 1.19 | 975501   | 11.99 | 12.38 | -5.56  |
| Malawi                | 29.57 | 22.30 | 44.08 | 42.81 | 63.8  | 62.41 | 1.39 | 873074   | 44.74 | 45.78 | 9.45   |
| Malaysia              | 8.05  | 5.88  | 72.87 | 72.29 | 74.88 | 74.44 | 0.44 | 242587   | 2.76  | 2.97  | -24.14 |
| Maldives              | 19.56 | 7.87  | 70.06 | 68.72 | 76.98 | 76.38 | 0.60 | 4703     | 9.88  | 11.15 | -55.22 |
| Mali                  | 45.98 | 33.63 | 48.9  | 46.75 | 58.46 | 56.56 | 1.90 | 1374120  | 19.55 | 20.98 | -11.63 |
| Malta                 | 4.98  | 3.58  | 78.2  | 77.81 | 81.95 | 81.66 | 0.29 | 1080     | 4.80  | 4.95  | -25.64 |
| Marshall Islands      | 17.60 | 15.25 | 65.24 | 64.11 | 73.0  | 71.90 | 1.10 | 1486     | 11.89 | 12.15 | -2.65  |
| Mauritania            | 33.60 | 27.82 | 60.02 | 58.07 | 63.2  | 61.49 | 1.71 | 223877   | 5.30  | 5.89  | -12.31 |
| Mauritius             | 13.31 | 9.60  | 71.66 | 70.72 | 74.35 | 73.64 | 0.71 | 10049    | 3.75  | 4.13  | -24.47 |
| Mexico                | 7.03  | 5.52  | 74.3  | 73.78 | 76.92 | 76.50 | 0.42 | 996849   | 3.53  | 3.69  | -19.23 |
| Micronesia, Fed. Sts. | 21.11 | 18.39 | 67.28 | 65.89 | 69.23 | 67.98 | 1.25 | 3104     | 2.90  | 3.17  | -10.07 |
| Moldova               | 10.44 | 7.93  | 66.89 | 66.20 | 71.63 | 71.07 | 0.56 | 24171    | 7.09  | 7.36  | -18.84 |
| Mongolia              | 12.58 | 7.34  | 62.91 | 62.13 | 69.82 | 69.31 | 0.51 | 36183    | 10.98 | 11.56 | -34.62 |
| Montenegro            | 6.00  | 3.99  | 73.18 | 72.74 | 76.34 | 76.04 | 0.30 | 2093     | 4.32  | 4.54  | -31.82 |
| Morocco               | 34.99 | 25.13 | 68.5  | 66.18 | 74.29 | 72.47 | 1.82 | 1308787  | 8.45  | 9.50  | -21.55 |
| Mozambique            | 27.85 | 19.50 | 48.69 | 47.37 | 55.37 | 54.31 | 1.06 | 1124273  | 13.72 | 14.65 | -19.70 |
| Myanmar               | 30.69 | 20.36 | 62.08 | 60.23 | 66.04 | 64.72 | 1.32 | 1208919  | 6.38  | 7.45  | -28.65 |
| Namibia               | 13.42 | 11.38 | 55.12 | 54.39 | 64.92 | 64.19 | 0.73 | 54461    | 17.78 | 18.02 | 0.00   |
| Nepal                 | 28.77 | 18.72 | 62.33 | 60.59 | 69.97 | 68.68 | 1.29 | 708360   | 12.26 | 13.35 | -25.86 |
| Netherlands           | 5.31  | 1.83  | 77.99 | 77.58 | 81.71 | 81.56 | 0.15 | 27000    | 4.77  | 5.13  | -63.41 |
| New Zealand           | 3.46  | 2.26  | 78.64 | 78.37 | 81.46 | 81.28 | 0.18 | 10723    | 3.59  | 3.71  | -33.33 |
| Nicaragua             | 11.02 | 7.50  | 69.66 | 68.90 | 75.1  | 74.54 | 0.56 | 67051    | 7.81  | 8.19  | -26.32 |
| Niger                 | 40.62 | 38.07 | 50.7  | 48.72 | 61.97 | 59.70 | 2.27 | 2155744  | 22.23 | 22.54 | 14.65  |
| Nigeria               | 55.17 | 44.81 | 46.62 | 44.18 | 53.05 | 50.77 | 2.28 | 15912954 | 13.79 | 14.92 | -6.56  |
| Norway                | 3.72  | 2.19  | 78.63 | 78.34 | 82.1  | 81.92 | 0.18 | 10980    | 4.41  | 4.57  | -37.93 |
| Oman                  | 9.99  | 8.51  | 72.36 | 71.64 | 77.32 | 76.67 | 0.65 | 52788    | 6.85  | 7.02  | -9.72  |
| Pakistan              | 56.35 | 45.09 | 62.77 | 59.42 | 66.38 | 63.52 | 2.86 | 15238844 | 5.75  | 6.90  | -14.63 |
| Palau                 | 10.95 | 9.01  | 70.49 | 69.73 | 73.0  | 72.35 | 0.65 | 183      | 3.56  | 3.76  | -14.47 |
| Panama                | 8.77  | 6.18  | 75.1  | 74.45 | 77.77 | 77.29 | 0.48 | 36066    | 3.56  | 3.81  | -26.15 |
| Papua New Guinea      | 19.21 | 16.17 | 58.8  | 57.69 | 62.78 | 61.78 | 1.00 | 208629   | 6.77  | 7.09  | -9.91  |
| Paraguay              | 19.19 | 13.57 | 70.07 | 68.75 | 73.03 | 72.05 | 0.98 | 132496   | 4.22  | 4.80  | -25.76 |
| Peru                  | 13.92 | 9.03  | 70.51 | 69.54 | 74.78 | 74.11 | 0.67 | 417548   | 6.06  | 6.57  | -30.93 |
| Philippines           | 14.53 | 10.99 | 66.68 | 65.73 | 68.41 | 67.67 | 0.74 | 1743333  | 2.59  | 2.95  | -22.11 |
| Poland                | 4.69  | 2.35  | 73.75 | 73.41 | 78.2  | 78.02 | 0.18 | 65160    | 6.03  | 6.28  | -47.06 |
| Portugal              | 3.70  | 2.18  | 76.31 | 76.03 | 81.52 | 81.34 | 0.18 | 15060    | 6.83  | 6.98  | -35.71 |
| Qatar                 | 7.58  | 5.75  | 76.5  | 75.92 | 78.76 | 78.31 | 0.45 | 12904    | 2.95  | 3.15  | -22.41 |
| Romania               | 6.80  | 4.15  | 71.16 | 70.68 | 74.96 | 74.65 | 0.31 | 51582    | 5.34  | 5.62  | -35.42 |
| Russian Federation    | 7.75  | 4.49  | 65.48 | 64.98 | 70.91 | 70.59 | 0.32 | 623961   | 8.29  | 8.63  | -36.00 |
| Rwanda                | 27.82 | 17.59 | 48.19 | 46.89 | 64.52 | 63.40 | 1.12 | 376154   | 33.89 | 35.21 | -13.85 |

|                             |       |       |       |       |       |       |      |         |       |       |        |
|-----------------------------|-------|-------|-------|-------|-------|-------|------|---------|-------|-------|--------|
| Samoa                       | 12.10 | 11.05 | 69.49 | 68.66 | 73.76 | 72.95 | 0.81 | 3672    | 6.14  | 6.25  | -2.41  |
| San Marino                  | 4.90  | 2.60  | 80.62 | 80.23 | 83.3  | 83.08 | 0.22 | 85      | 3.32  | 3.55  | -43.59 |
| Sao Tome & Principe         | 24.88 | 16.47 | 63.29 | 61.75 | 66.51 | 65.43 | 1.08 | 6835    | 5.09  | 5.96  | -29.87 |
| Saudi Arabia                | 19.22 | 14.13 | 72.53 | 71.16 | 74.49 | 73.45 | 1.04 | 641306  | 2.70  | 3.22  | -24.09 |
| Senegal                     | 35.89 | 25.09 | 57.77 | 55.77 | 66.8  | 65.17 | 1.63 | 942937  | 15.63 | 16.85 | -18.50 |
| Serbia                      | 7.84  | 5.98  | 71.58 | 71.02 | 75.49 | 75.04 | 0.45 | 41720   | 5.46  | 5.66  | -19.64 |
| Seychelles                  | 11.32 | 9.83  | 72.4  | 71.59 | 73.23 | 72.52 | 0.71 | 1213    | 1.15  | 1.30  | -12.35 |
| Sierra Leone                | 40.71 | 24.96 | 38.69 | 37.18 | 51.31 | 50.06 | 1.25 | 272876  | 32.62 | 34.64 | -17.22 |
| Singapore                   | 3.53  | 2.58  | 77.95 | 77.68 | 82.6  | 82.39 | 0.21 | 11200   | 5.97  | 6.06  | -22.22 |
| Slovak Republic             | 3.91  | 2.94  | 73.05 | 72.77 | 77.21 | 76.98 | 0.23 | 12452   | 5.69  | 5.79  | -17.86 |
| Slovenia                    | 2.70  | 2.85  | 75.41 | 75.21 | 81.08 | 80.85 | 0.23 | 5038    | 7.52  | 7.50  | 15.00  |
| Solomon Islands             | 20.04 | 17.91 | 62.84 | 61.61 | 68.15 | 66.95 | 1.20 | 20084   | 8.45  | 8.67  | -2.44  |
| Somalia                     | 40.82 | 36.80 | 50.88 | 48.88 | 55.69 | 53.71 | 1.98 | 880191  | 9.45  | 9.88  | -1.00  |
| South Africa                | 22.94 | 17.76 | 55.84 | 54.59 | 57.44 | 56.44 | 1.00 | 1014226 | 2.87  | 3.39  | -20.00 |
| South Sudan                 | 37.28 | 30.98 | 49.22 | 47.45 | 56.11 | 54.42 | 1.69 | 727065  | 14.00 | 14.69 | -4.52  |
| Spain                       | 3.31  | 2.88  | 78.97 | 78.71 | 83.38 | 83.14 | 0.24 | 89074   | 5.58  | 5.63  | -7.69  |
| Sri Lanka                   | 7.60  | 4.91  | 71.11 | 70.57 | 74.95 | 74.58 | 0.37 | 115405  | 5.40  | 5.68  | -31.48 |
| St. Lucia                   | 13.18 | 12.16 | 71.42 | 70.49 | 75.18 | 74.28 | 0.90 | 2552    | 5.26  | 5.38  | -3.23  |
| St Vincent & the Grenadines | 12.57 | 10.90 | 70.58 | 69.70 | 73.05 | 72.26 | 0.79 | 1285    | 3.50  | 3.67  | -10.23 |
| Sudan                       | 30.09 | 24.99 | 57.97 | 56.28 | 63.71 | 62.16 | 1.55 | 1995625 | 9.90  | 10.45 | -8.28  |
| Suriname                    | 24.64 | 19.82 | 67.93 | 66.30 | 71.29 | 69.90 | 1.39 | 13607   | 4.95  | 5.43  | -14.72 |
| Swaziland                   | 16.20 | 12.50 | 48.66 | 47.88 | 48.87 | 48.27 | 0.60 | 21991   | 0.43  | 0.81  | -23.08 |
| Sweden                      | 3.81  | 2.86  | 79.64 | 79.34 | 82.55 | 82.31 | 0.24 | 27100   | 3.65  | 3.74  | -20.00 |
| Switzerland                 | 3.25  | 2.82  | 79.68 | 79.42 | 83.2  | 82.97 | 0.23 | 19685   | 4.42  | 4.47  | -11.54 |
| Syrian Arab Republic        | 14.75 | 11.27 | 72.72 | 71.66 | 70.09 | 69.31 | 0.78 | 330832  | -3.62 | -3.28 | -26.42 |
| Tajikistan                  | 19.36 | 14.18 | 63.7  | 62.49 | 69.77 | 68.79 | 0.98 | 262004  | 9.53  | 10.08 | -19.01 |
| Tanzania                    | 32.68 | 22.94 | 50.47 | 48.87 | 65.49 | 64.02 | 1.47 | 3009700 | 29.76 | 31.00 | -8.13  |
| Thailand                    | 7.74  | 5.00  | 70.63 | 70.09 | 74.6  | 74.23 | 0.37 | 274082  | 5.62  | 5.91  | -31.48 |
| Timor-Leste                 | 27.01 | 18.10 | 59.35 | 57.79 | 68.53 | 67.31 | 1.22 | 63429   | 15.47 | 16.47 | -21.79 |
| Togo                        | 46.24 | 35.36 | 53.47 | 51.11 | 60.12 | 58.07 | 2.05 | 512578  | 12.44 | 13.62 | -13.14 |
| Tonga                       | 9.60  | 8.93  | 70.76 | 70.09 | 72.94 | 72.29 | 0.65 | 1670    | 3.08  | 3.14  | -2.99  |
| Trinidad and Tobago         | 17.94 | 11.24 | 68.6  | 67.39 | 70.56 | 69.78 | 0.78 | 14743   | 2.86  | 3.55  | -35.54 |
| Tunisia                     | 15.01 | 9.25  | 73.26 | 72.18 | 74.98 | 74.29 | 0.69 | 145185  | 2.35  | 2.92  | -36.11 |
| Turkey                      | 12.91 | 7.05  | 70    | 69.11 | 75.43 | 74.90 | 0.53 | 745884  | 7.76  | 8.38  | -40.45 |
| Turkmenistan                | 22.96 | 17.31 | 63.9  | 62.47 | 65.74 | 64.62 | 1.12 | 128762  | 2.88  | 3.44  | -21.68 |
| Uganda                      | 30.25 | 21.48 | 46.42 | 45.06 | 59.18 | 57.94 | 1.24 | 1968738 | 27.49 | 28.58 | -8.82  |
| Ukraine                     | 12.50 | 8.88  | 67.86 | 67.02 | 71.19 | 70.56 | 0.63 | 272536  | 4.91  | 5.28  | -25.00 |
| United Arab Emirates        | 8.98  | 7.42  | 74.45 | 73.79 | 77.54 | 76.97 | 0.57 | 55165   | 4.15  | 4.31  | -13.64 |
| United Kingdom              | 3.67  | 2.95  | 77.74 | 77.46 | 81.6  | 81.36 | 0.24 | 182057  | 4.97  | 5.03  | -14.29 |
| United States               | 3.12  | 2.96  | 76.64 | 76.40 | 78.74 | 78.51 | 0.23 | 875684  | 2.74  | 2.76  | -4.17  |
| Uruguay                     | 8.57  | 6.59  | 74.69 | 74.06 | 77.14 | 76.63 | 0.51 | 24562   | 3.28  | 3.47  | -19.05 |
| Uzbekistan                  | 15.88 | 12.19 | 66.94 | 65.89 | 68.45 | 67.63 | 0.82 | 550803  | 2.26  | 2.64  | -21.90 |
| Vanuatu                     | 14.37 | 14.10 | 67.56 | 66.60 | 72.16 | 71.16 | 1.00 | 6797    | 6.81  | 6.85  | 4.17   |
| Venezuela, RB               | 9.03  | 7.18  | 72.35 | 71.70 | 74.41 | 73.88 | 0.53 | 318246  | 2.85  | 3.04  | -18.46 |
| Vietnam                     | 15.25 | 10.25 | 73.15 | 72.05 | 75.78 | 75.01 | 0.77 | 1212550 | 3.60  | 4.11  | -30.00 |
| West Bank and Gaza          | 9.72  | 7.54  | 70.76 | 70.08 | 73.07 | 72.52 | 0.55 | 82653   | 3.26  | 3.48  | -19.12 |
| Yemen, Rep.                 | 38.01 | 29.87 | 60.46 | 58.25 | 64.03 | 62.17 | 1.86 | 1528448 | 5.90  | 6.73  | -15.84 |
| Zambia                      | 27.02 | 21.30 | 43.46 | 42.32 | 60.79 | 59.52 | 1.27 | 781240  | 39.88 | 40.64 | 11.40  |
| Zimbabwe                    | 20.35 | 21.04 | 41.69 | 40.86 | 59.16 | 57.94 | 1.22 | 664926  | 41.90 | 41.80 | 46.99  |

Notes: LE and SALE stand for traditional life expectancy and stillbirths adjusted life expectancy, respectively. Out of 194 countries in App. 2, life expectancy data are unavailable for Andorra, Cook Islands, Dominica, Monaco, Nauru, St. Kitts and Nevis, and Tuvalu. Traditional Life expectancy data is from World Development Indicators (WDI). WDI does not have 2015 life expectancy numbers for Marshall Islands and Palau. These numbers as estimated by U.S. Census Bureau: International Database are used. SLBR numbers are from App. 2. |SALE-LE| measures decrease in life expectancy due to considering stillbirths. The last column gives its % change.
